# Supplementary material
Source: PubMed Central journal article supplement (PMC2805757)
Supplement: NIHMS164614-supplement-1_si_001.pdf [file NIHMS164614-supplement-1_si_001.pdf]

## **Supporting Information**

### **Enthalpy-entropy Contribution to Carcinogen-induced DNA Conformational Heterogeneity**

Fengting Liang and Bongsup P. Cho

*Department of Biomedical and Pharmaceutical Sciences, University of Rhode Island, Kingston, RI 02881*

## Supporting Information

### Enthalpy-entropy Contribution to Carcinogen-induced DNA Conformational Heterogeneity

Fengting Liang and Bongsup P. Cho

*Department of Biomedical and Pharmaceutical Sciences, University of Rhode Island, Kingston, RI 02881*

**Adduct Synthesis.** Crude oligodeoxynucleotides in 15 mmol desalted form were obtained from Sigma-Genosys (The Woodlands, TX). All high performance liquid chromatography (HPLC) solvents were purchased from Fisher, Inc. (Pittsburgh, PA). Following the published procedures (10, 23), we prepared FABP- and FAF-modified 11-mer oligonucleotides d(5'-CCATCG\*CAACC-3, in which G\* is either an FABP- or FAF-modified dG adduct (Figure 1a). The HPLC system used for purification of the oligos consisted of a Hitachi EZChrom Elite unit (Ibaraki-ken, Japan) with a L2450 diode array as a detector and employed a Phenomenex Luna C18 column (10 x 150 mm, 2.5 mm) (Torrance, CA) with a 40-min gradient system involving 3 to 15% acetonitrile in pH 7.0 ammonium acetate buffer (0.10 M) with a flow rate of 2.0 mL/min. The modified oligos were characterized by ESI-TOF-MS analysis as reported previously and annealed individually with appropriate complementary strand to produce the desired duplexes (Figure 1). An identical set of unmodified duplexes was also prepared as controls.

**UV-Melting.** UV-melting data were obtained using a Beckman DU 800 UV/VIS spectrophotometer equipped with a 6-chamber, 1-cm path-length T<sub>m</sub> cell. Sample cell temperatures were controlled by a Peltier mechanism. Duplexes with a total concentration in the range of 0.2 - 14 μM were prepared in solutions containing 0.2 M NaCl, 10 mM Na<sub>3</sub>PO<sub>4</sub>, and 0.2 mM EDTA at pH 7.0. Thermomelting curves were constructed by varying the temperature of the sample cell (1°C/min) and monitoring the absorbance of the sample at 260 nm. A typical melting experiment consisted of forward/reverse scans and was repeated three times. Thermodynamic parameters were calculated using the program MELTWIN<sup>®</sup> version 3.5, as described previously (10, 31).

**Circular Dichroism (CD).** CD measurements were conducted on a Jasco J-810 spectropolarimeter equipped with a Peltier mechanism. Duplex samples (2 ODS single strand concentration) in 400 μL of the UV buffer (described above) were placed in a 1-mm path-length cell and heated at 85°C for 5 min and then cooled to 15°C over a 10 min period to ensure complete duplex formation. Spectra were then acquired every 0.2 nm with a 2-s response time from 200 to 400 nm at a rate of 50 nm/min and were averaged from 10 accumulations and smoothed using the 17 point adoptive algorithms provided by Jasco.

Dynamic NMR. Duplex samples (20 ~ 40 ODS) were pelleted in an ultracentrifuge using a Pall Microsep MF centrifugal device (Yellow, MW cutoff = 1,000). The centrifuged samples were dissolved in 300  $\mu$ L of a pH 7.0 buffer (100 mM NaCl, 10 mM Na<sub>3</sub>PO<sub>4</sub>, and 100  $\mu$ M EDTA in 10% D<sub>2</sub>O/90% H<sub>2</sub>O) and filtered into through a Shigemi tube using a 0.2  $\mu$ m membrane filter.

All <sup>1</sup>H and <sup>19</sup>F NMR results were recorded using a dedicated 5-mm <sup>19</sup>F/<sup>1</sup>H dual probe on a Bruker DPX400 Avance spectrometer operating at 400.0 and 376.5 MHz, respectively. Imino proton spectra were obtained using phase sensitive jump-return sequences at 5°C and referenced relative to DSS (2,2-dimethyl-2-silapentane-5-sulfonate). <sup>19</sup>F NMR spectra were acquired in the <sup>1</sup>H-decoupled mode and referenced to CFCl<sub>3</sub> by assigning external hexafluorobenzene in C<sub>6</sub>D<sub>6</sub> at -164.90 ppm. One-dimensional <sup>19</sup>F NMR spectra were measured between 0°C and 60°C using increments of 5~10°C. Additional temperatures were used as needed to clarify the signal exchange process. Temperatures were maintained by a Bruker VT unit by adding liquid N<sub>2</sub> to the probe. Spectra were obtained by collecting 65,536 points using a 37,664-Hz sweep width and a recycle delay of 1.0 s. A total of 1200 scans were acquired for each dynamic NMR spectrum. All free induction decays were processed by zero-filling, exponential multiplication using a 20 Hz line broadening factor, and Fourier transformation. NOESY/exchange <sup>19</sup>F NMR spectra were obtained in the phase-sensitive mode using the following parameters: sweep width 4529 Hz, number of complex data points in  $t_2$  1024; number of complex FIDs in  $t_1$  256; number of scans 96; dummy scans 16; recycle delays 1.0 s; and, mixing time 400 ms. The data were apodized with sine function using 2 Hz line broadening in both dimensions and Fourier transformed with the 1024  $\times$  256 data matrix.

C:\Xcalibur\1\Mr Sperry\normangca\_fabp  
5u/min, 1:1 ACN/H2O, 0.05% NH4OH  
normangca\_fabp #321-357 RT: 2.93-3.66 AV: 37 NL: 8.66E3  
F: FTMS - p ESI Full.ms [330.00-1500.00]

1/28/2008 2:30:35 PM

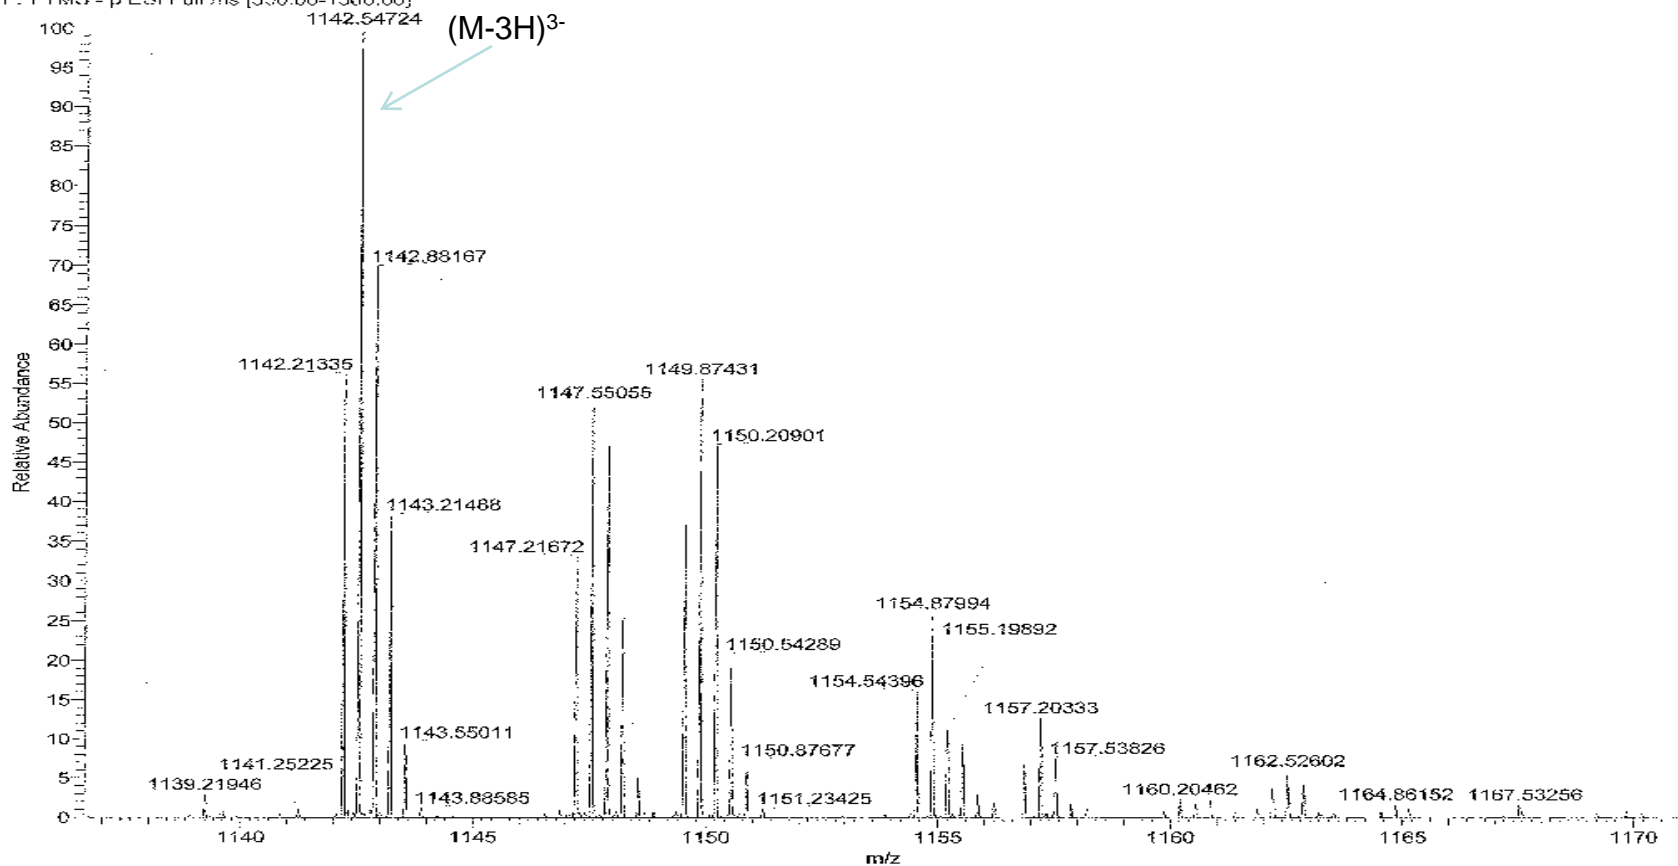

**Figure S1.** The results for the ESI-linear ion trap/FTMS spectrum of FABP-modified **CCATCG\*CAACC**. For the (M-3H)<sup>3-</sup> ion the measured mass is m/z 1142.547. The theoretical mass is m/z 1142.546. This is a difference of 0.9 ppm. This corresponds to theoretical and experimental molecular masses of 3430.662 and 3430.665 daltons, respectively.

C:\Xcalibur\data\Mr Sperry\normangca\_faf 1/28/2008 2:11:01 PM  
Sul/min, 1:1 ACN/H2O, 0.05% NH4OH  
normangca\_faf#187-195 RT: 2.08-2.23 AV: 9 NL: 8.12E4  
F: FTMS - p ESI sid=40.00 Full ms [300.00-1500.00]

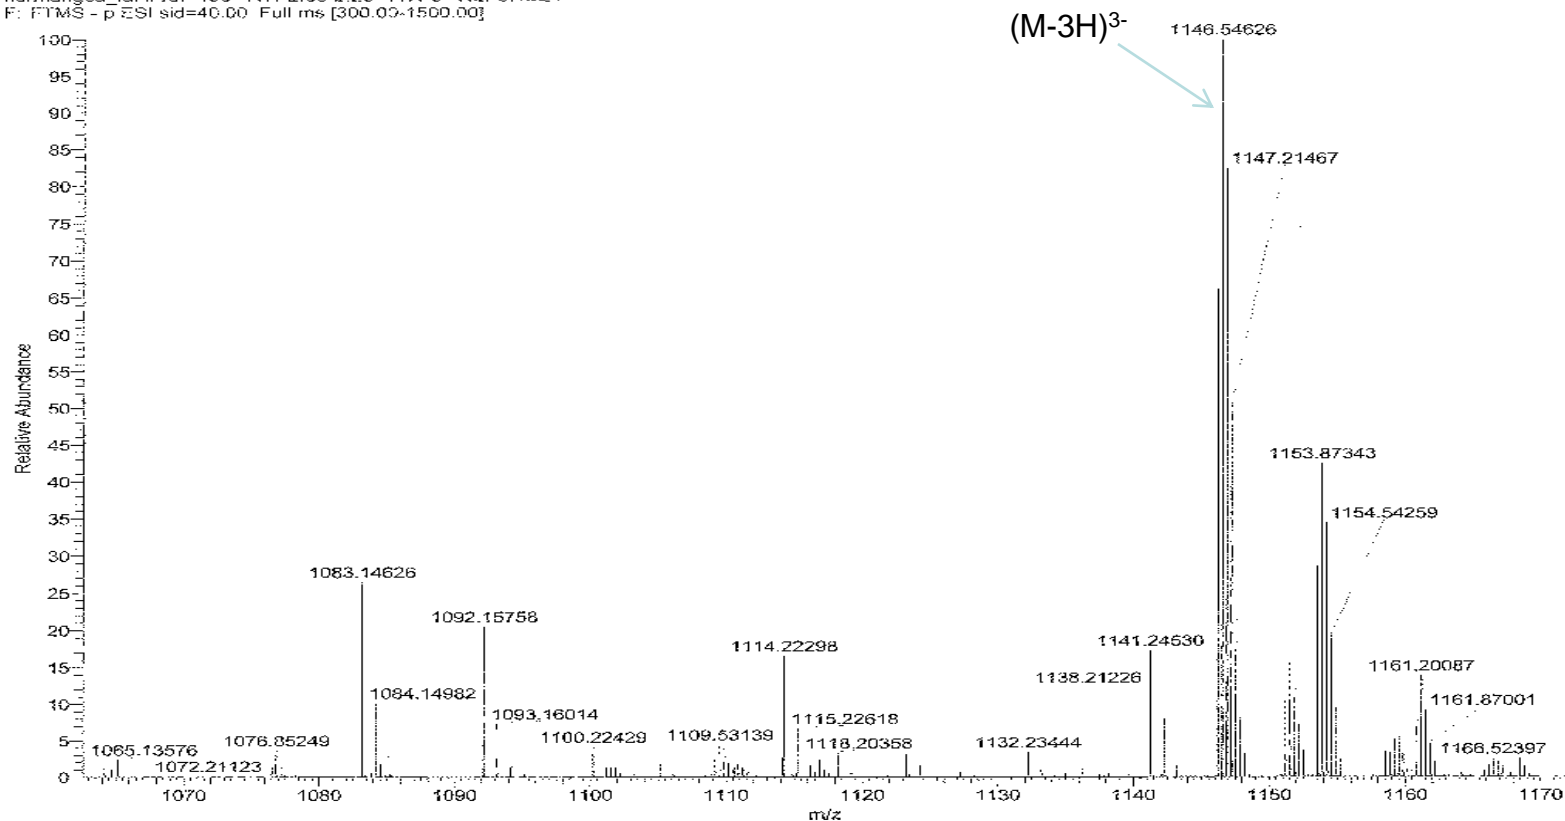

**Figure S2.** The results for the ESI-linear ion trap/FTMS spectrum of FAF-modified **CCATCG\*CAACC**. For the  $(M-3H)^{3-}$  ion the measured mass is  $m/z$  1146.546. The theoretical mass is  $m/z$  1146.545. This is a difference of 0.9 ppm. This corresponds to theoretical and experimental molecular masses of 3442.659 and 3442.662 daltons, respectively.

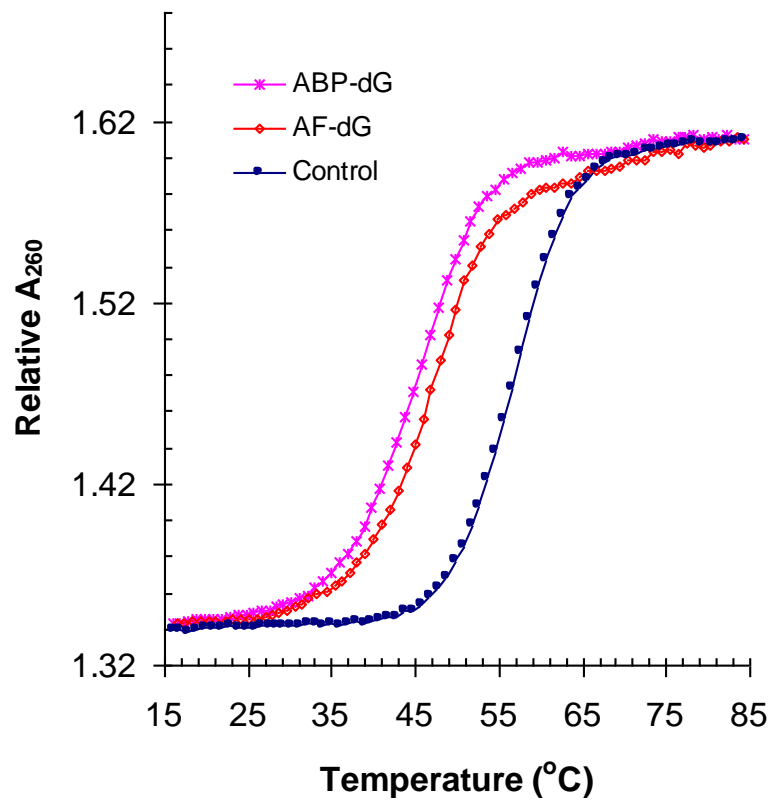

**Figure S3.** UV melting profiles at 260 nm for the FABP- (pink), AF-adduct (red) and the control 11-mer duplexes at 7.6  $\mu\text{M}$  duplex concentration. The melting curves were normalized for clarity.

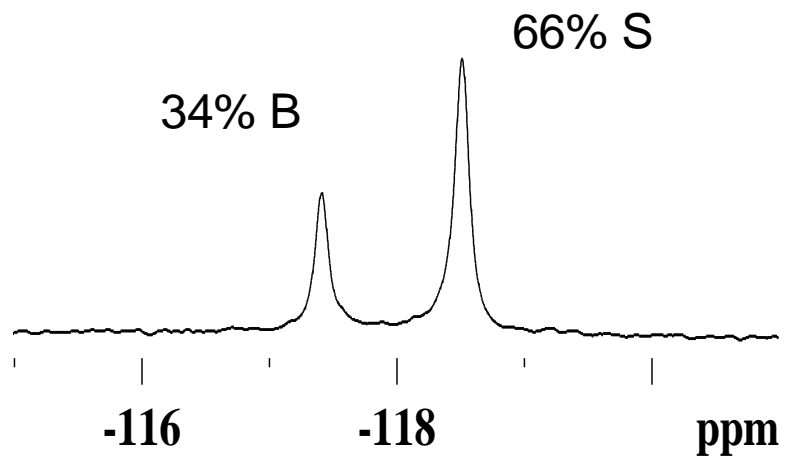

— 17 °C

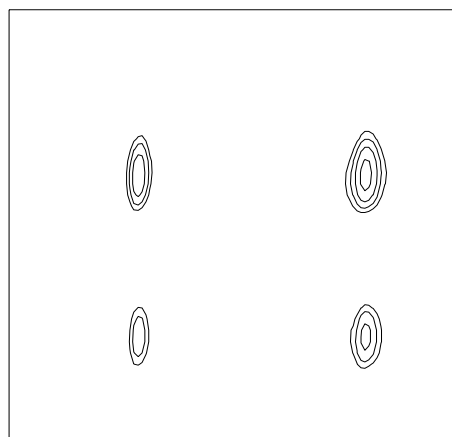

— 5 °C

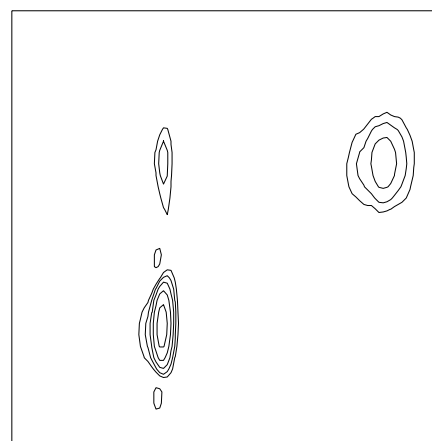

**Figure S4.** Temperature dependence of NOESY/EXSY <sup>19</sup>F NMR of FAF-modified DNA.

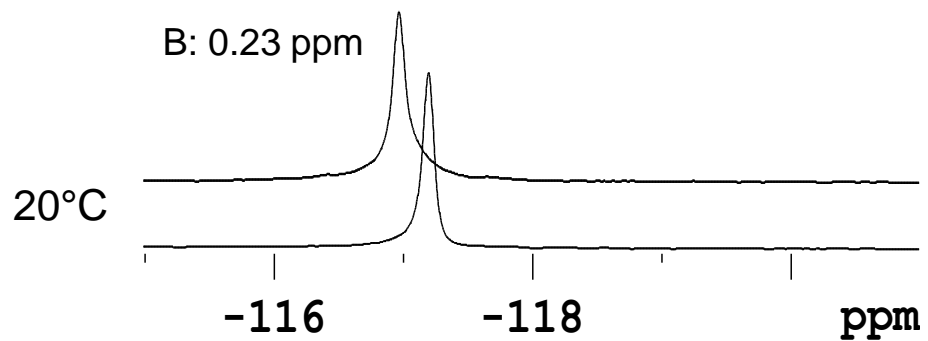

**Figure S5.** The  $^{19}\text{F}$  NMR measurement of  $\text{D}_2\text{O}$  effect of FABP-modified [5'-CCATCG\*CAACC-3']: [3'-GGTAGCGTTGG] at  $20^\circ\text{C}$ .

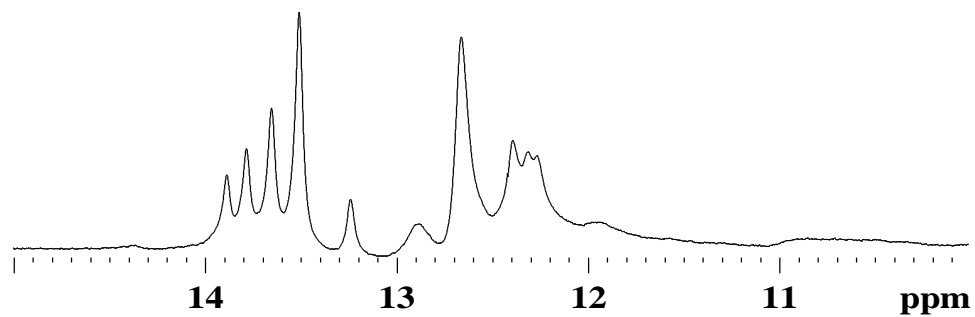

**Figure S6.** The imino  $^1\text{H}$  NMR spectrum of FABP-modified [5'-CCATCG\*CAACC-3']: [3'-GGTAGCGTTGG] at  $20^\circ\text{C}$ .



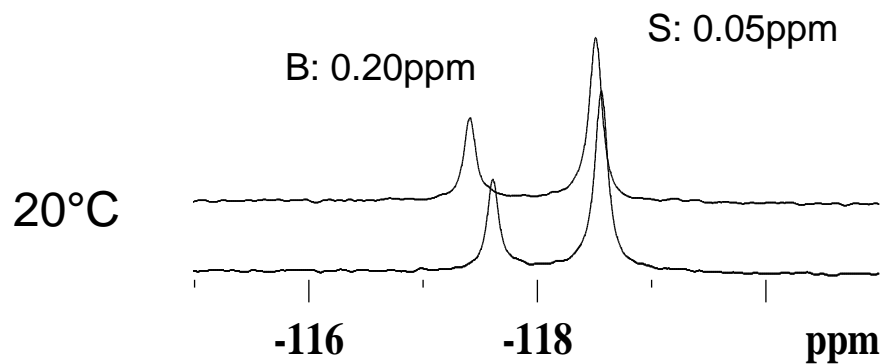

**Figure S7.** The  $^{19}\text{F}$  NMR measurement of  $\text{D}_2\text{O}$  effect of FAF-modified [5'-CCATCG\*CAACC-3']: [3'-GGTAGCGTTGG] duplex at  $20^\circ\text{C}$ .

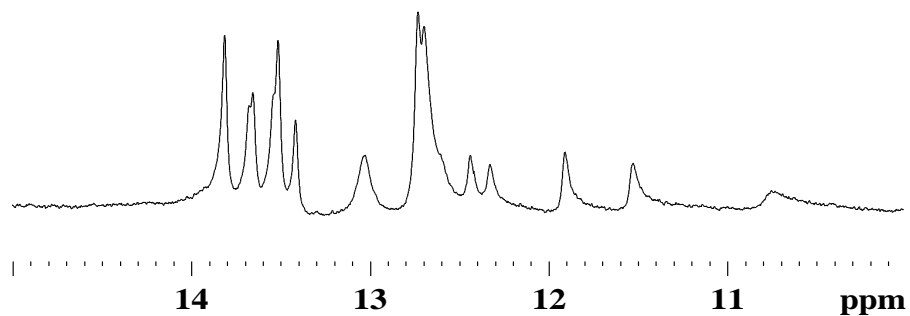

**Figure S8.** The imino  $^1\text{H}$  NMR spectrum of FAF-modified [5'-CCATCG\*CAACC-3']: [3'-GGTAGCGTTGG] duplex at  $5^\circ\text{C}$ .

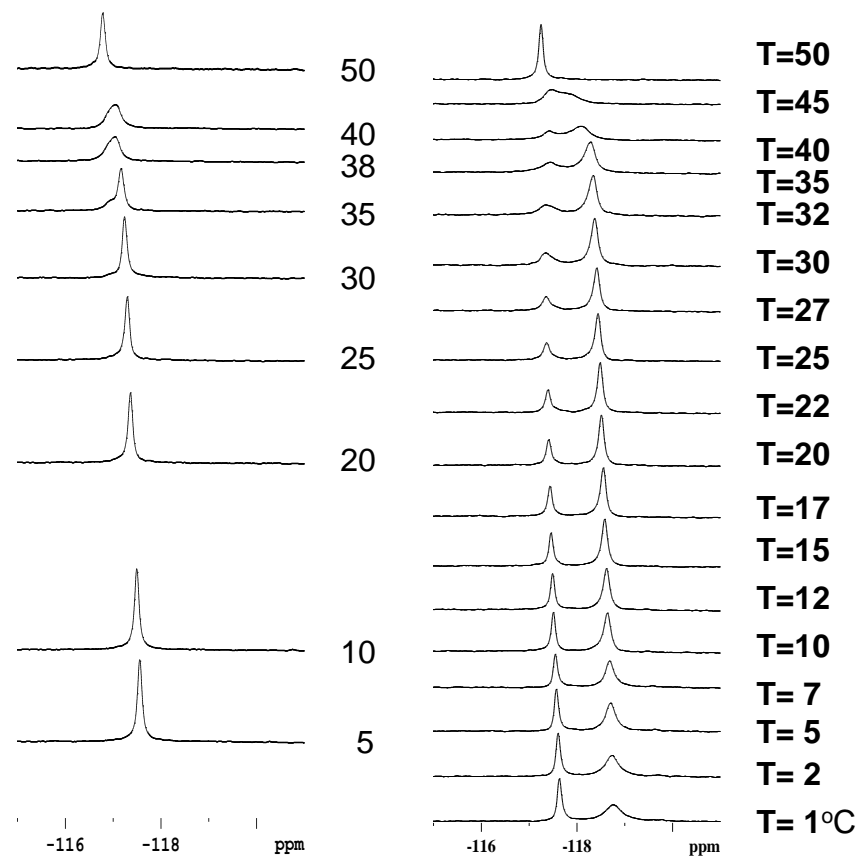

**Figure S9.** Dynamic  $^{19}\text{F}$  NMR of the FABP- and FAF-modified DNA duplexes as a function of temperatures.

## Supporting Table S1: UV Melting-derived thermodynamics

CCATC**G**CAACC  
GGTAGCGTTGG

|         | Fits of individual melting curves    |                        | 1/T <sub>m</sub> vs ln Ct/4          |                        |
|---------|--------------------------------------|------------------------|--------------------------------------|------------------------|
|         | $\Delta G^\circ$ (37C)<br>(kcal/mol) | T <sub>m</sub><br>(°C) | $\Delta G^\circ$ (37C)<br>(kcal/mol) | T <sub>m</sub><br>(°C) |
| Control | -12.7 ± 0.2                          | 60.6                   | -12.7 ± 0.2                          | 60.5                   |
| FABP    | -9.4 ± 0.1                           | 49.7                   | -9.4 ± 0.1                           | 49.8                   |
| FAF     | -9.7 ± 0.2                           | 51.0                   | -9.5 ± 0.1                           | 52.0                   |
